# Supplementary material for: Direct count of fluorescent microspheres in a microfluidic chip based on the capillary electrophoresis method
Source: Royal Society of Chemistry journal article supplement (doi:10.1039/d3ay00710c), 2023-01-01
Supplement: d3ay00710c3.pdf [file d3ay00710c3.pdf]

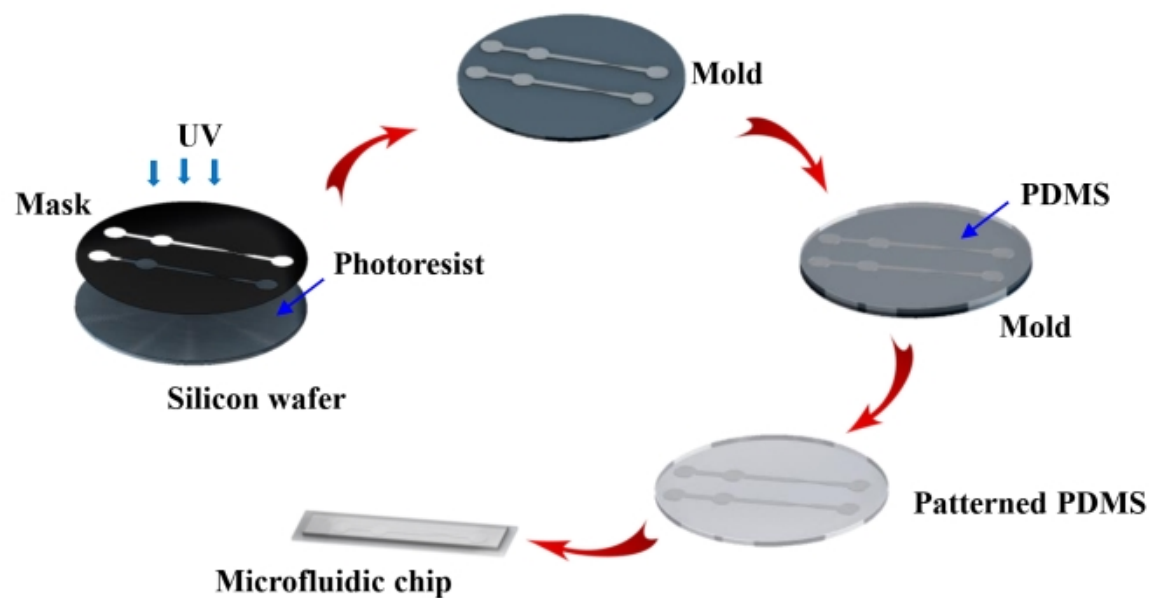

**Scheme S1** The process of making the microfluidic chip.

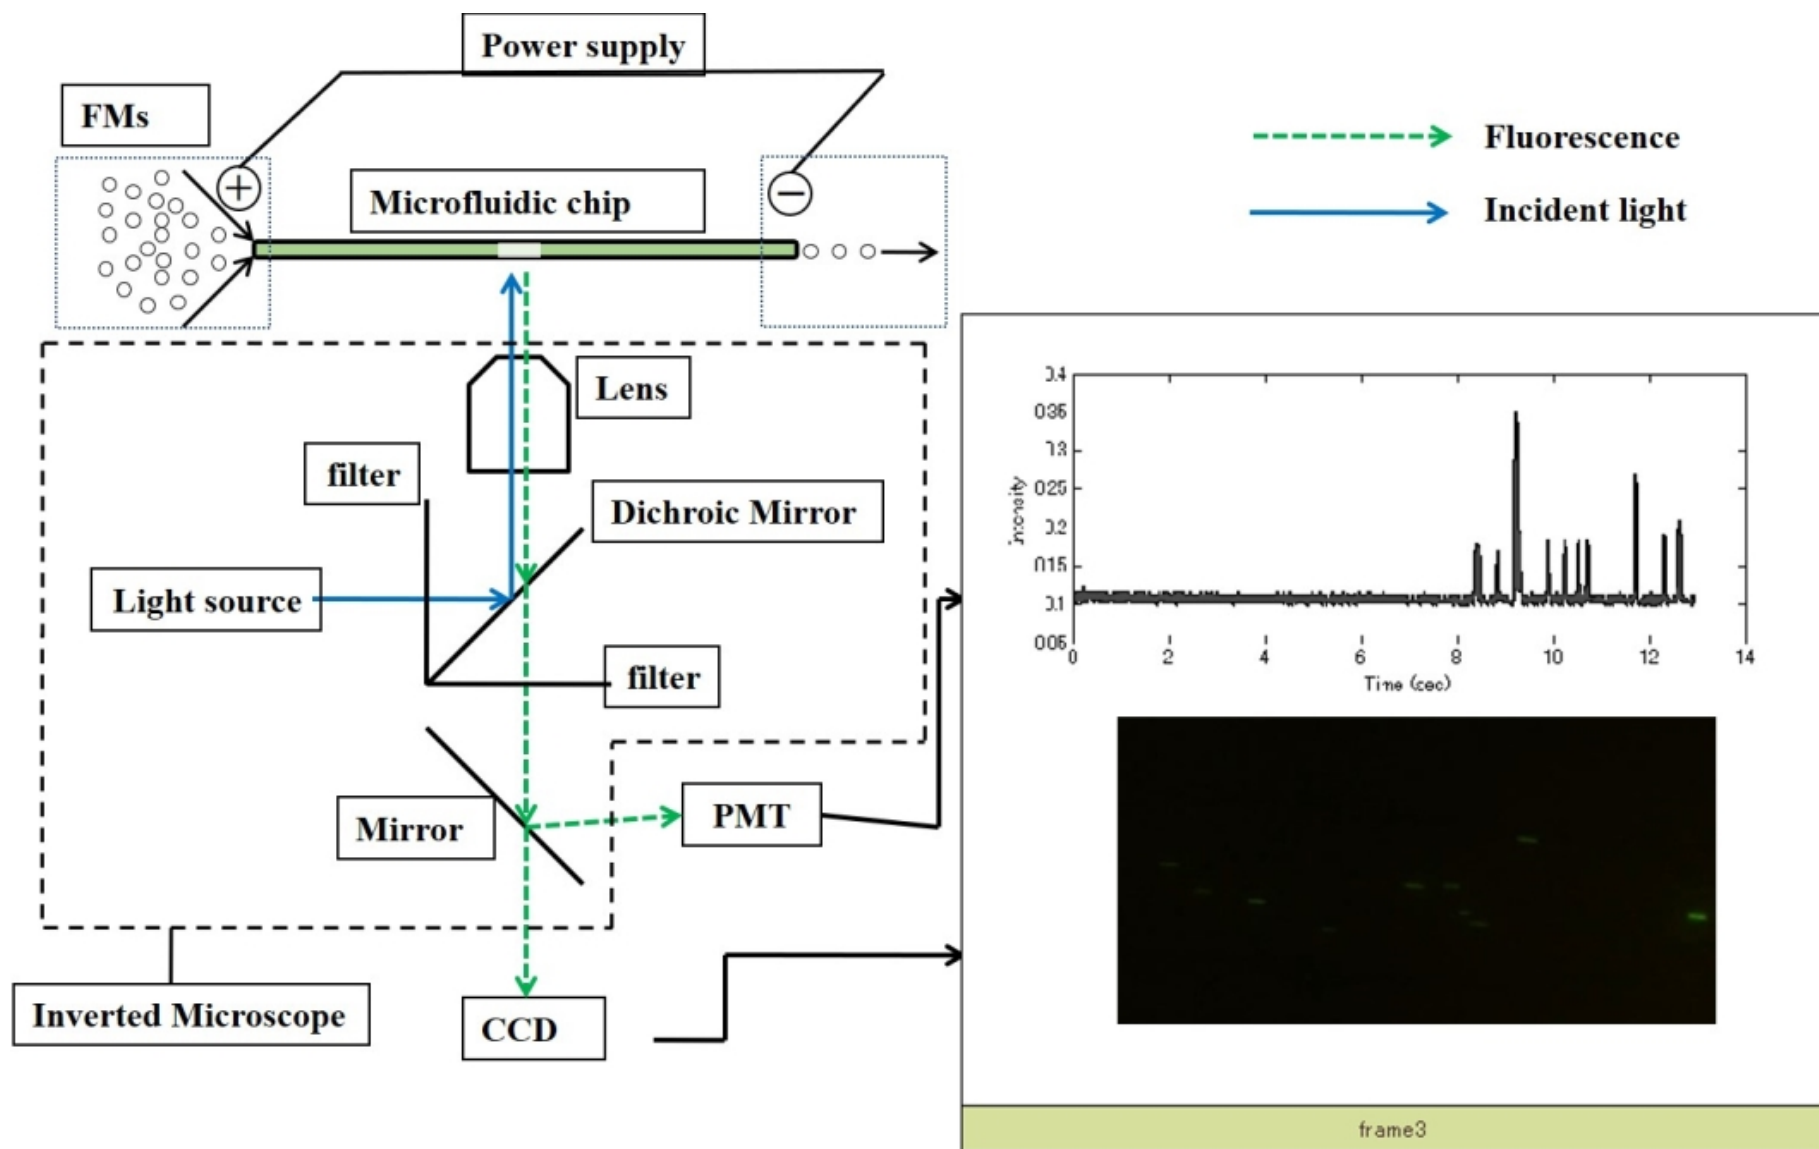

**Fig.S1** The working principle of the CE system

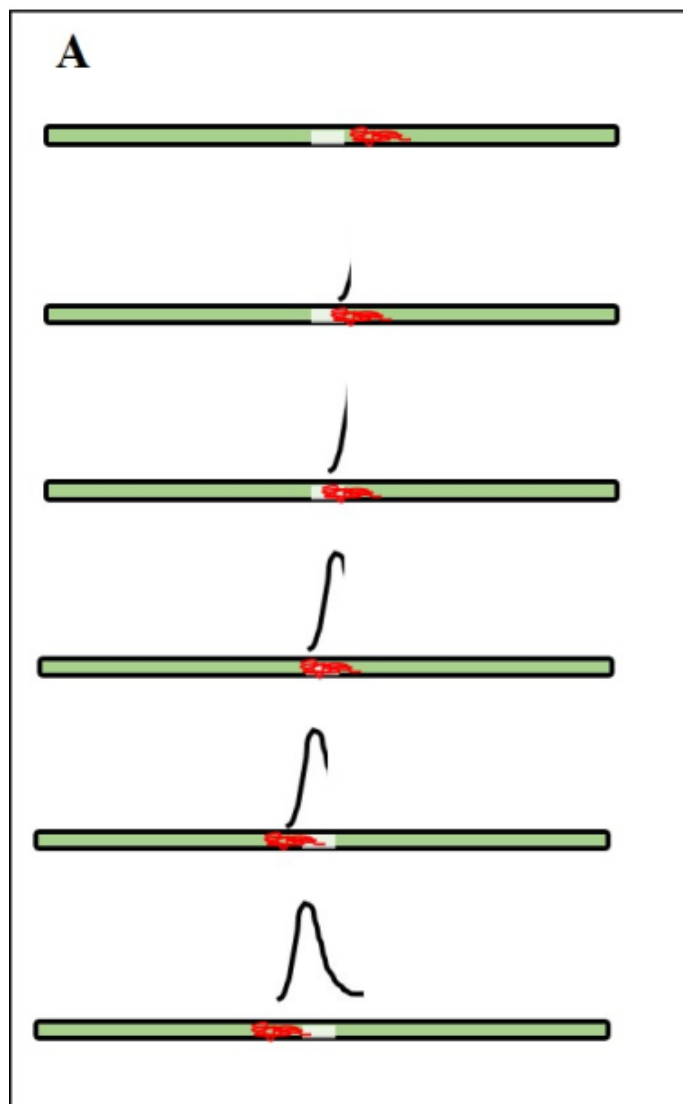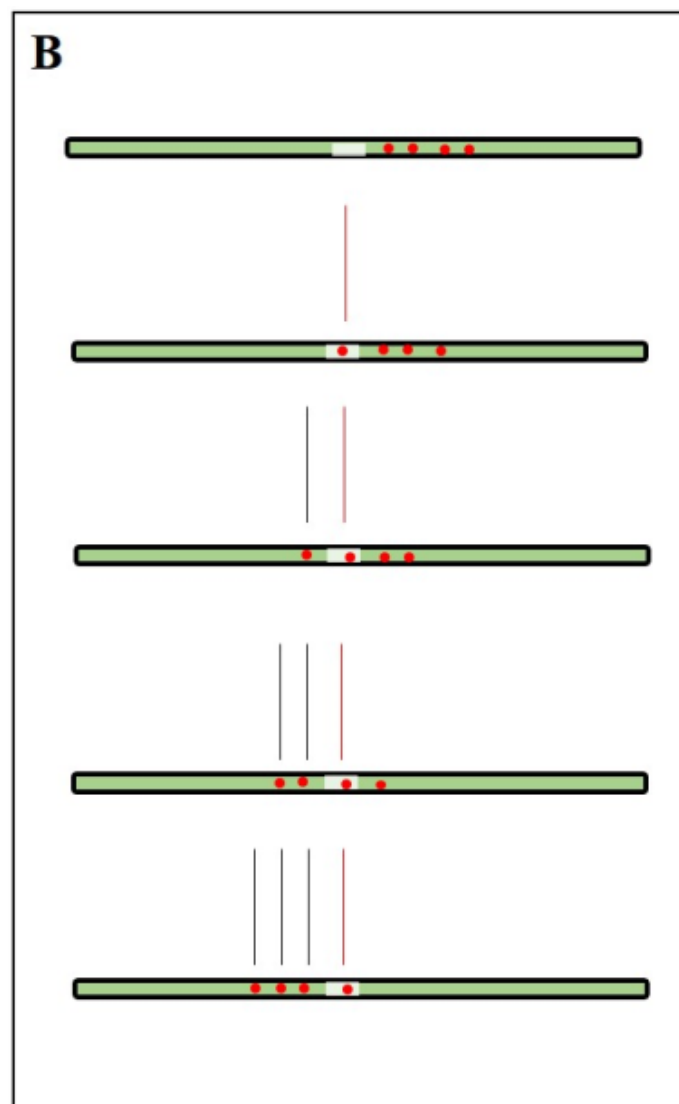

**Fig.S2** The peak of the FMs in electropherogram: (A) FMs aggregate (B) dispersed FMs.

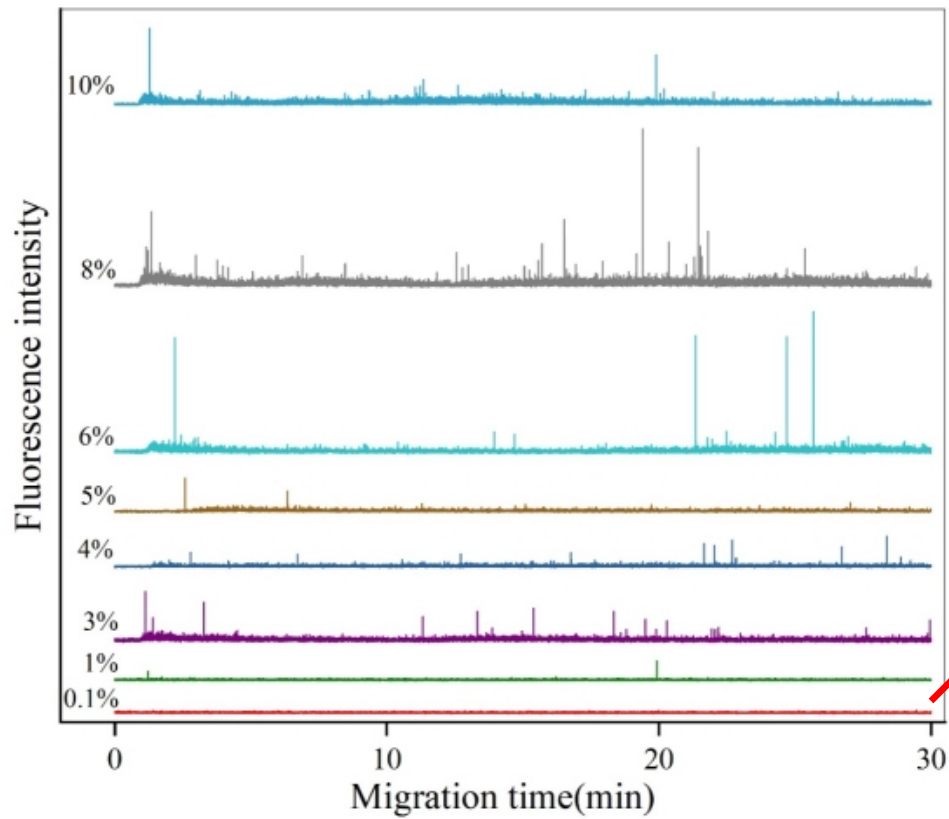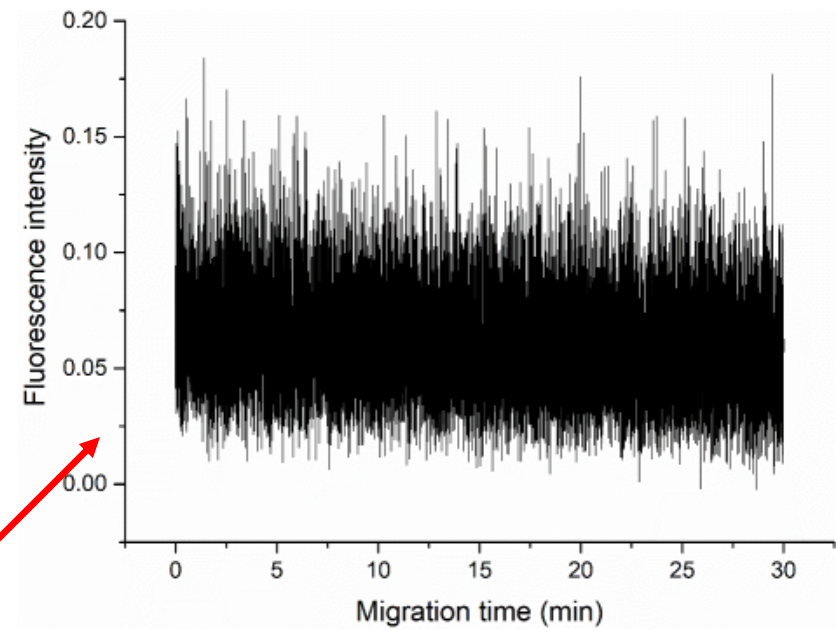

**Fig.S3** The electropherogram of fluorescent microspheres with concentration from 0.1% to 10%.

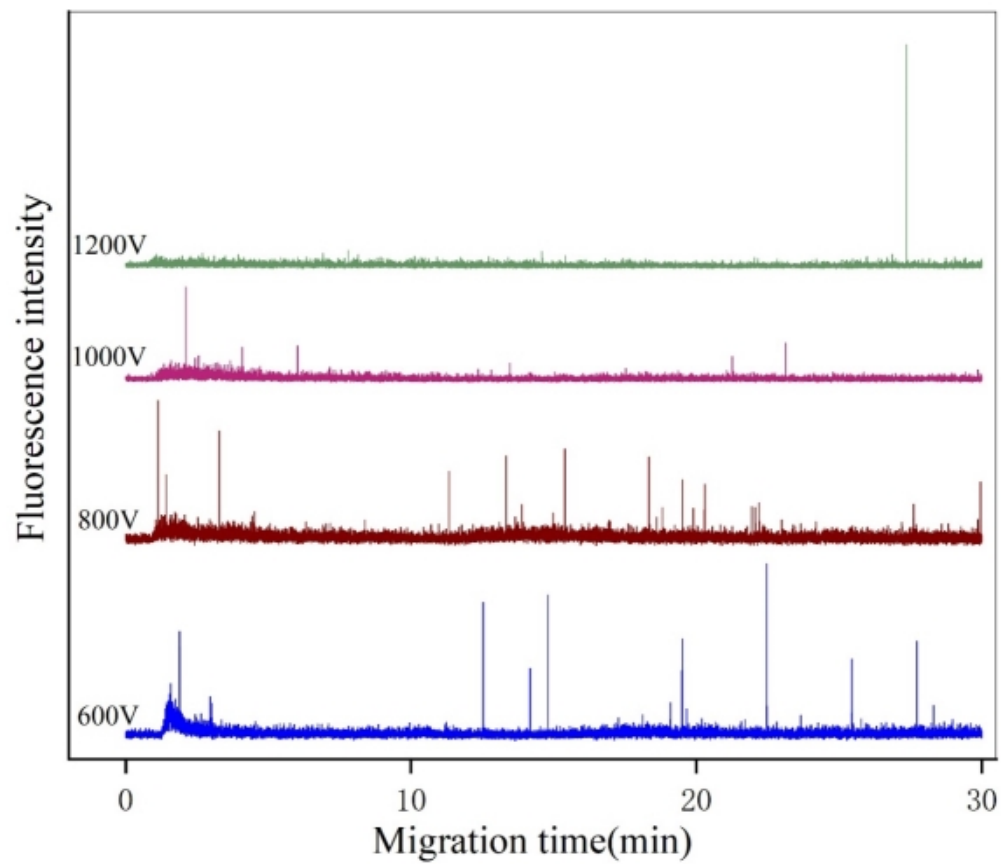

**Fig.S4** The electropherogram of fluorescent microspheres migrating in the microchannel at voltages from 600 V to 1200 V.

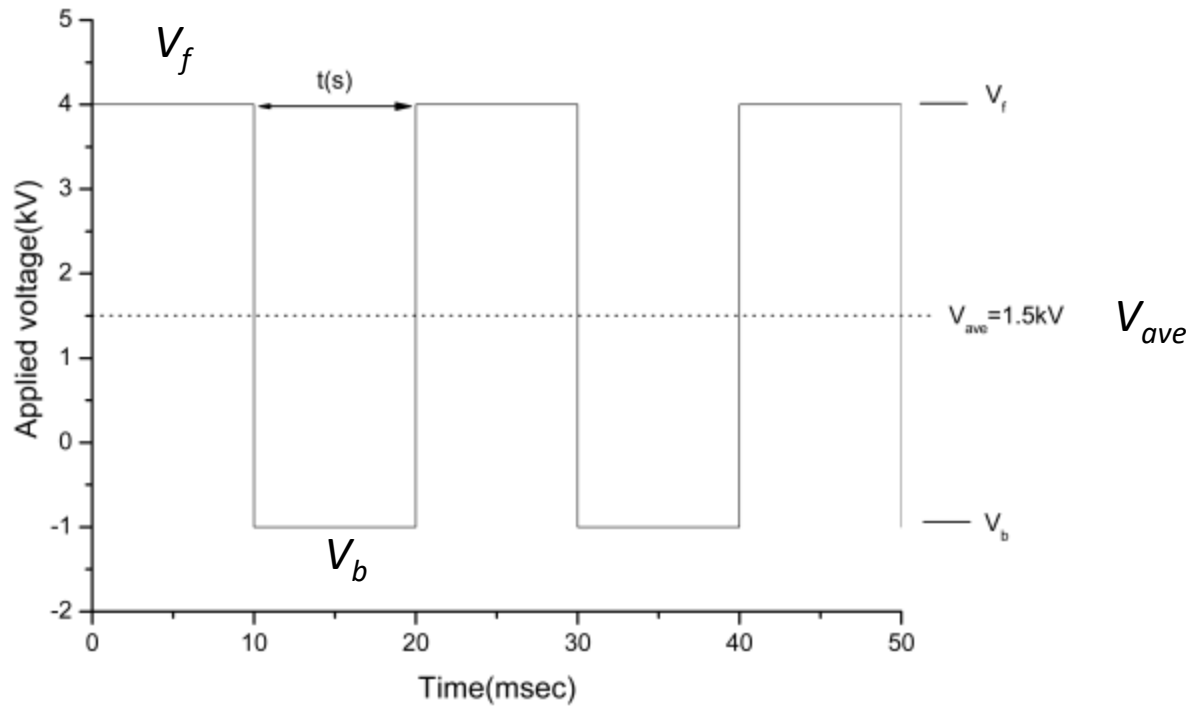

**Fig.S5 The definition of pulsed field electric field.**

$$V_{ave} = \frac{V_f + V_b}{2}$$

$$Modulation : M = \frac{V_f - V_{ave}}{V_{ave}} \times 100(\%)$$

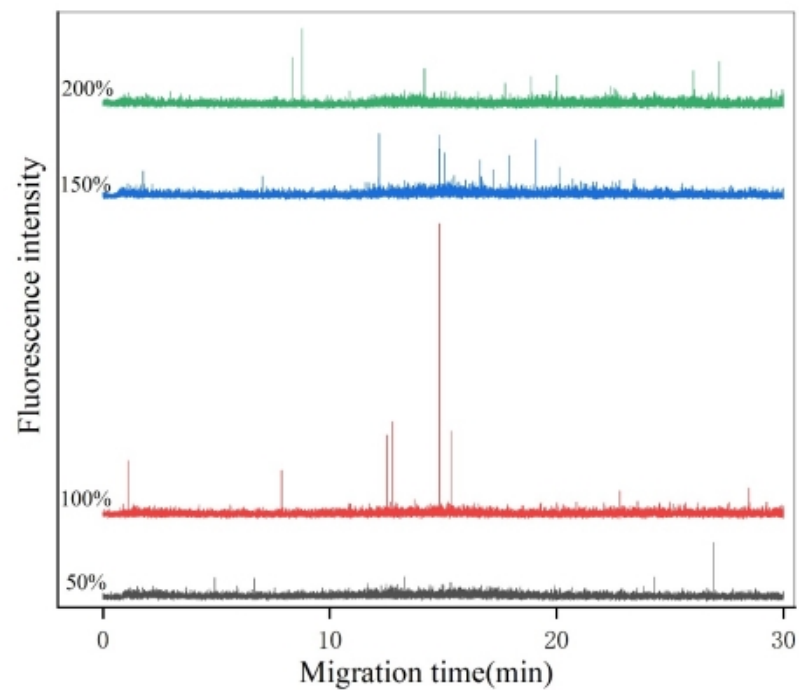

**Fig.S6** The electropherogram of fluorescent microspheres migrating in the microchannel at pulsed electric field strength with modulation depth from 50% to 200%.
